# Supplementary material
Source: PubMed Central journal article supplement (PMC2276392)

Supplemental Figure S2. The dystrophin Dp71 and myospryn TRIM regions interact *in vitro*. Protein extracts harvested from COS cells co-transfected with FLAG-Dp71 and Myc-Spe were immunoprecipitated with anti-FLAG antibodies. Precipitated proteins were fractionated and immunoblotted with anti-Myc antibodies. Effective immunoprecipitation of myospryn TRIM (Spe) by the dystrophin Dp71 region is observed. Input was loaded and immunoblotted with anti-Myc antibody and anti-FLAG antibody confirming the expression of Spe and Dp71, respectively.

**Figure S2**

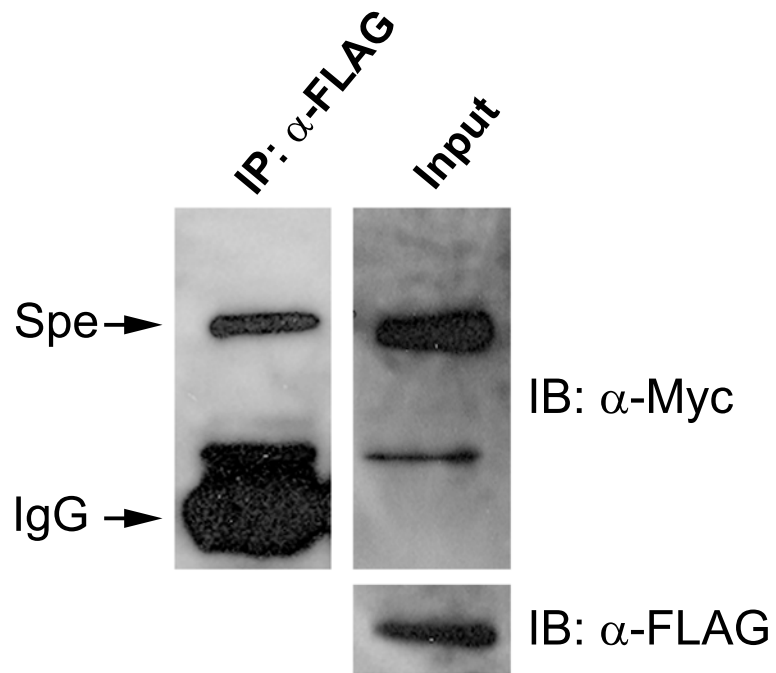

Supplement: jbc_C700221200_2.pdf [file jbc_C700221200_2.pdf]
